# Supplementary material for: Technical note: Greenhouse gas flux studies: an automated online system for gas emission measurements in aquatic environments
Source: Copernicus journal article supplement (doi:10.5194/hess-24-3417-2020), 2020-07-06
Supplement: Supplementary file 2 [file hess-24-3417-2020-supplement.zip]

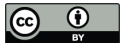

## *Supplement of*

# **Technical note: Greenhouse gas flux studies: an automated online system for gas emission measurements in aquatic environments**

**Nguyen Thanh Duc et al.**

*Correspondence to:* Nguyen Thanh Duc (thanh.duc.nguyen@liu.se)

- hess-24-3417-2020-supplement-title-page.pdf
- SI 3
  - .DS\_Store
  - ABC\_Duc et al\_Supplement\_FINAL\_revised.pdf
  - Xbeedatalogger\_board
    - \* BOM\_Xbeedatalogger.xlsx
    - \* Xbeedatalogger.brd
    - \* Xbeedatalogger.sch
  - pwc\_v8c
    - \* .DS\_Store
    - \* BOM\_PWCv8c\_digikey.xlsx
    - \* Top layer copper.cmp
    - \* Top layer copper.gpi
    - \* bottom layer copper.gpi
    - \* bottom layer copper.sol
    - \* bottom silk screen.gpi
    - \* bottom silk screen.pls
    - \* bottom solder mask.gpi
    - \* bottom solder mask.sts
    - \* drills.dri
    - \* drills.ncd
    - \* pwc8c\_partlist
    - \* top silk screen.gpi
    - \* top silk screen.plc
    - \* top solder mask.gpi
    - \* top solder mask.stc
    - \* Copy of Bomexample(1).xlsx

The copyright of individual parts of the supplement might differ from the CC BY 4.0 License.
